20 **Acknowledgments:**

21 This research was supported in part by the Department of Veterans Affairs,  
22 Veterans Health Administration, Office of Research and Development, Biomedical  
23 Laboratory Research and Development Merit Review Award I01-BX004938 (ES), a  
24 Department of Defense CDMRP Award W81XWH-18-1-0598 (ES), NIH  
25 T32NS007466 (KAB), NIH R01-NS080979 (GLW), and NINDS 1R21NS102948 (Ines  
26 Koerner/ES). We would like to acknowledge the OHSU Advanced Light Microscopy  
27 Center and imaging support from the NIH P30NS061800 (OHSU). The contents of  
28 this manuscript do not represent the views of the U.S. Department of Veterans  
29 Affairs or the United States Government.

30

31 **Abstract**

32  $\alpha 2\delta$  proteins (*CACNA2D1-4*) are required for normal neurological function, although  
33 the mechanisms whereby  $\alpha 2\delta$  proteins control neuronal output remain unclear.  
34 Using whole-cell recordings of mouse cerebellar Purkinje cells, we show that  $\alpha 2\delta$ -2  
35 is required for coupling postsynaptic voltage-dependent calcium entry to effector  
36 mechanisms controlling depolarization-induced suppression of excitation as well as  
37 action potential afterhyperpolarization. Our findings indicate that  $\alpha 2\delta$ -2 is  
38 necessary for the function of postsynaptic calcium signaling nanodomains.

39

40

## 41 **Introduction**

42 Many intracellular signaling cascades are triggered by a common messenger:  
43 calcium entering via voltage-gated  $\text{Ca}^{2+}$  channels (VGCCs) on the plasma membrane.  
44 Specificity of  $\text{Ca}^{2+}$ -dependent signaling at the membrane depends on proximity of  
45 VGCCs to effectors in functional “nanodomains,” in which  $[\text{Ca}^{2+}]$  declines steeply  
46 with distance from a VGCC (1). These nanodomains are critical for neuronal  
47 function. For example, in Purkinje cells (PCs), depolarization-induced suppression of  
48 excitation (DSE) is initiated via  $\text{Ca}^{2+}$ -dependent endocannabinoid release that  
49 mediates short-term presynaptic depression (2-4). Likewise, VGCC- $\text{K}_{\text{Ca}}$  clusters,  
50 expressed throughout PC somata and dendrites (5), generate the  
51 afterhyperpolarization (AHP) following action potentials, ultimately setting  
52 spontaneous spike rate (6, 7). Thus, molecules coupling VGCCs to effector-specific  
53 signaling critically contribute to transduction of neuronal outputs.

54 Auxiliary VGCC  $\alpha 2\delta$  proteins (*CACNA2D1-4*) contribute to VGCC membrane  
55 trafficking in heterologous cells and neurons (8), and may play a role in presynaptic  
56 VGCC coupling to vesicle release machinery (9). However, little is known about  
57 auxiliary functions of  $\alpha 2\delta$  outside of these contexts, and previous examination of  
58 their postsynaptic roles suggest  $\text{Ca}^{2+}$ -independent functions (10). Here we report  
59 that in PCs, which abundantly and exclusively express  $\alpha 2\delta$ -2 (11-13), loss of  $\alpha 2\delta$ -2  
60 (*CACNA2D2*) disrupts two disparate forms of postsynaptic VGCC nanodomain  
61 signaling, demonstrating previously unappreciated roles for  $\alpha 2\delta$  proteins in VGCC-  
62 effector coupling.

## 63 Results

64 At PC climbing fiber synapses, postsynaptic VGCC-mediated Ca<sup>2+</sup> entry  
65 initiates retrograde endocannabinoid signaling, acutely reducing the probability of  
66 presynaptic vesicle release - a form of plasticity known as depolarization-induced  
67 suppression of excitation, or DSE (3, 4). Specificity of DSE signaling is achieved by  
68 tight functional coupling of postsynaptic VGCCs with Ca<sup>2+</sup>-sensitive  
69 endocannabinoid release machinery (14). Using whole-cell recordings of PCs in  
70 acutely prepared brain slices from *CACNA2D2* KO and WT littermate mice, we  
71 investigated whether the absence of  $\alpha 2\delta$ -2 affects this postsynaptic Ca<sup>2+</sup>-dependent  
72 signaling.

73 We held PCs at -70 mV in voltage-clamp mode during climbing fiber axon  
74 stimulation and recorded evoked excitatory postsynaptic currents (EPSCs). In WT  
75 PCs, DSE elicited with a 250 ms depolarizing step reduced the amplitude of regularly  
76 evoked EPSCs by 25% (**Fig 1A-E**). In contrast, DSE was completely absent in KO PCs  
77 (**Fig 1B-E**). The *ducky* mouse, which also lacks  $\alpha 2\delta$ -2 protein, has a reported ~30%  
78 decrease in PC somatic VGCC current density, which is thought to represent  
79 decreased surface trafficking (15). As the degree of climbing fiber DSE is related to  
80 the magnitude of Ca<sup>2+</sup> influx, it is possible that the reduced VGCC density prevented  
81 DSE. Increasing the length of the depolarizing step enhances Ca<sup>2+</sup> influx and DSE in  
82 wildtype mice (2); however, a four-fold increase in depolarizing step duration still  
83 failed to evoke DSE in  $\alpha 2\delta$ -2 KO PCs (**Fig 1D-F**).

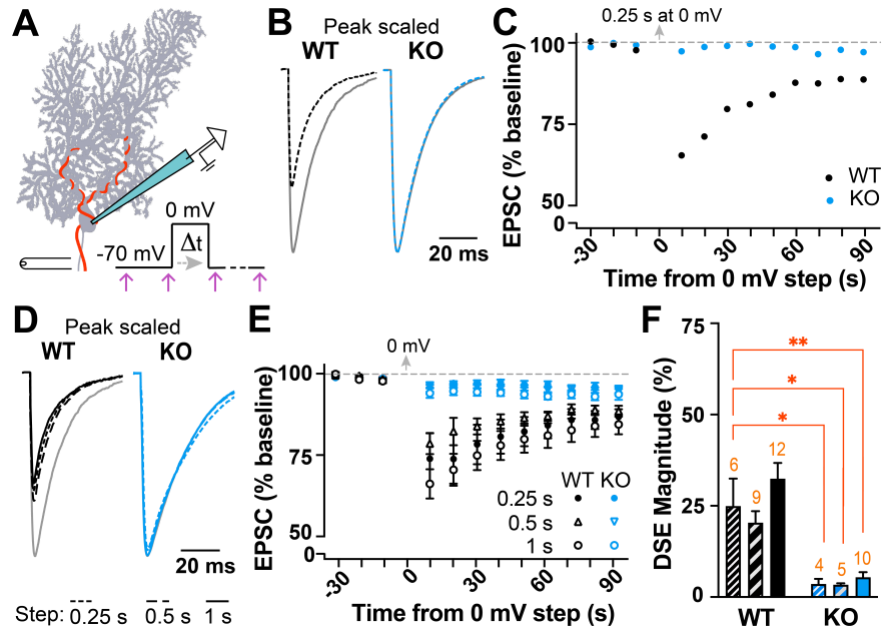

**Figure 1 Depolarization-Induced Suppression of Excitation (DSE) reduces climbing fiber-EPSC amplitude in WT but not  $\alpha 2\delta$ -2 KO Purkinje cells.**

- A)** Schematic of whole-cell electrophysiological set-up. Purkinje cell (PC) is held at -70 mV using whole-cell voltage clamp while the innervating climbing fiber axon (red) is stimulated at 0.2 Hz (magenta arrows). After collection of baseline EPSCs, a depolarization step to 0 mV for a duration of 250 ms – 1s is delivered to the PC, and subsequent EPSCs are collected for >3 minutes.
- B)** Overlay of peak-scaled EPSC traces from WT (black) and KO (blue) PCs during baseline stimulation (gray) and 5 s post-depolarization step of 250 ms duration (dotted line).
- C)** EPSC amplitude timecourse from the representative experiment in B. Each point represents the average from two consecutive EPSCs at 0.2 Hz.
- D)** Overlay of peak-scaled EPSC traces from WT (black) and KO (blue) PCs during baseline (gray) and 5 s post-depolarization step of 250 ms (dotted line), 500 ms (dashed line), and 1 s (solid line) duration.
- E)** Summary of DSE timecourse from WT (black) and KO (blue) experiments using three different depolarization step durations: 250 ms (filled circle), 500 ms (triangle) and 1 s (open circle). Each point represents the average of two consecutive EPSCs at 0.2 Hz.
- F)** Magnitude of EPSC depression normalized to baseline in WT (black) and KO (blue) after 250 ms (fine stripe), 500 ms (wide stripe) and 1 s (solid) depolarization steps. n = cells (orange number over bars); each experiment

from > 3 mice. One-way ANOVA comparison to average WT 250 ms response, Dunnett's correction for multiple comparisons; \*  $p < 0.05$ , \*\*  $p < 0.01$ , \*\*\*  $p < 0.001$ .

84

85 As DSE was not rescued by increasing activation of VGCCs in KO PCs, we  
 86 hypothesized that functional coupling of  $Ca^{2+}$  influx to effector molecules was  
 87 disrupted in the absence of  $\alpha 2\delta$ -2. To examine this possibility, we lowered [EGTA] in  
 88 our internal solution. As expected for WT PCs, decreasing [EGTA] from 10 mM to  
 89 either 2 mM or 0.2 mM resulted in more profound DSE magnitude, which increased  
 90 with longer voltage steps (Fig 2A-C), consistent with further diffusion of  $Ca^{2+}$  from  
 91 its point of entry.

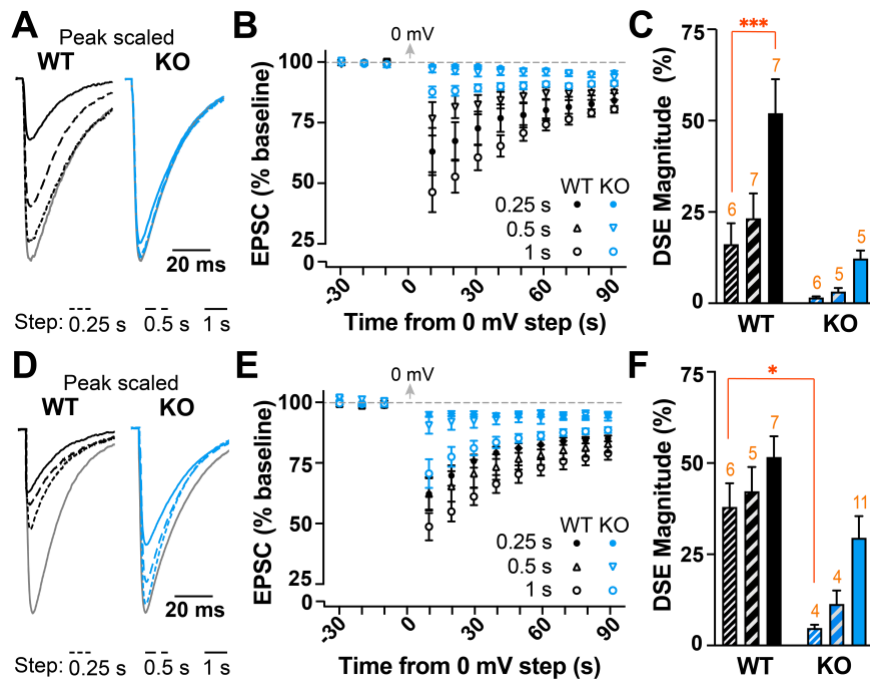

**Figure 2 Reduced intracellular [EGTA] reveals climbing fiber DSE in the  $\alpha 2\delta$ -2 KO.**

**A, D)** Overlay of peak-scaled EPSC traces from WT (black) and KO (blue) PCs during baseline stimulation (gray) and 5 s post-depolarization step of 250 ms

(dotted line), 500 ms (dashed line), and 1 s (solid line) duration using intracellular solution containing 2 mM (A) or 0.2 mM (D) EGTA.

**B, E**) Summary of DSE timecourse from WT (black) and KO (blue) experiments using a 2 mM (B) or 0.2 mM (E) EGTA internal solution and three different depolarization step durations: 250 ms (filled circle), 500 ms (triangle) and 1 s (open circle). Each point represents the average of two consecutive EPSCs at 0.2 Hz.

**C, F**) Magnitude of EPSC depression normalized to baseline in WT (black) and KO (blue) after 250 ms (fine stripe), 500 ms (wide stripe) and 1 s (solid) depolarization steps using a 2 mM (C) or 0.2 mM (F) EGTA intracellular solution. n = cells (orange number over bars); each experiment from > 3 mice. One-way ANOVA comparison to average WT 250 ms response, Dunnett's correction for multiple comparisons; \* p < 0.05, \*\* p < 0.01, \*\*\* p < 0.001.

92

93 More notably, however, reduced Ca<sup>2+</sup> buffering restored DSE in KO PCs (**Fig 2D-F**),

94 indicating that signaling mechanisms involved in DSE expression remained intact.

95 As the reduced Ca<sup>2+</sup> buffering primarily affects the distance of Ca<sup>2+</sup> diffusion from its

96 source, these data indicate that rather than affecting Ca<sup>2+</sup> entry per se,  $\alpha 2\delta$ -2 is

97 necessary for tight functional coupling between VGCCs and endocannabinoid

98 release.

99 To determine whether  $\alpha 2\delta$ -2 affects coupling of other molecules to

100 postsynaptic VGCC nanodomains, we focused on Ca<sup>2+</sup>-dependent action potential

101 AHPs. In PCs, the AHP is mediated by BK-type K<sub>Ca</sub> channels (16, 17), and regulates

102 sodium channel availability and PC firing rate (6, 18). To assess VGCC-K<sub>Ca</sub> coupling,

103 we recorded spontaneous spiking in PCs from WT and KO mice during whole-cell

104 current-clamp recordings. In agreement with previous studies in the *ducky* mutant

105 (15, 19), tonic spike rate in  $\alpha 2\delta$ -2 KO PCs was reduced compared to WT (**Fig 3A-B**).

106 More importantly, the AHP amplitude of individual spike waveforms was

107 consistently smaller in  $\alpha\delta\delta$ -2 KO cells (**Fig 3C-D**), indicating reduced  $K_{Ca}$  channel  
 108 activation (7, 16). Other membrane properties were unchanged in KO PCs, including  
 109 the resting membrane potential, maximum and minimum membrane polarization

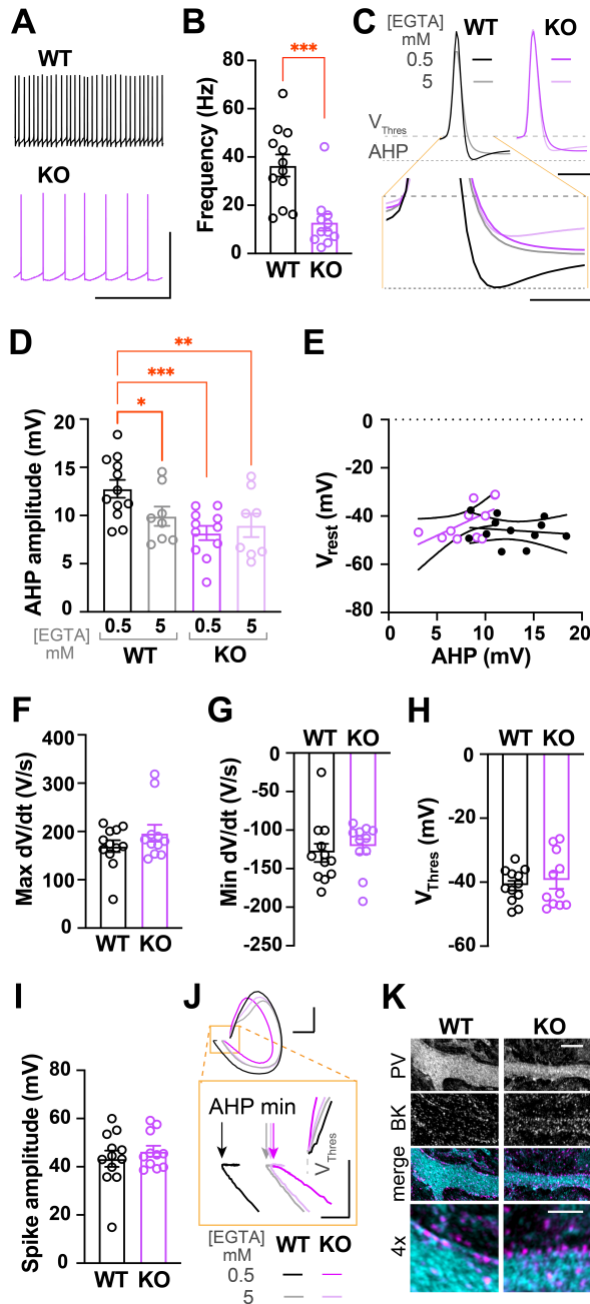

**Figure 3 Spontaneous firing frequency, afterhyperpolarization (AHP) amplitude and  $Ca^{2+}$  coupling are reduced in the  $\alpha\delta\delta$ -2 KO.**

A) Example traces of spontaneous action potentials in WT (black) and KO (magenta) PCs; scale = 50 mV, 0.5 s.

B) Summary of average spontaneous firing frequency in PCs. Student's unpaired t-test,  $p < 0.0001$ .

C) Average of 50 consecutive spontaneous action potentials from WT (0.5 mM EGTA, black; 5 mM EGTA, gray) and KO (0.5 mM EGTA, magenta; 5 mM EGTA, light purple) during tonic firing; scale = 10 mV, 2 ms. Gray dotted lines indicate  $V_{thres}$  as well as the minimum voltage during afterhyperpolarization (AHP). Below, enlarged overlay of traces to illustrate differences in  $V_{thres}$ -AHP amplitude; scale = 5 mV, 1 ms.

D) Summary of AHP amplitudes recorded after spontaneous action potentials using intracellular solution containing 0.5 mM EGTA or 5 mM EGTA. One-way



ANOVA comparison to average WT 0.5 mM EGTA response, uncorrected Fischer's LSD; \*  $p < 0.05$ , \*\*  $p < 0.01$ , \*\*\*  $p < 0.001$ .

**E)** Correlation of AHP amplitude vs. resting membrane potential ( $V_m$ ) in WT (black) and KO (magenta) PCs using 0.5 mM EGTA intracellular solution. Linear regression and 95% confidence interval; WT  $R^2 = <0.002$ ; KO  $R^2 = 0.393$ .

**F-I)** Action potential waveform parameters in WT and KO PCs. No significant differences found for maximum  $dV/dt$  (**F**), minimum  $dV/dt$  (**G**), spike threshold ( $V_{thres}$ ) (**H**) or spike height (**I**); unpaired Student's t-tests.

**J)** Phase plane plots of spontaneous spikes in WT (0.5 mM EGTA, black; 5 mM EGTA gray) and KO (0.5 mM EGTA, magenta; 5 mM EGTA light purple) PCs. Traces are aligned by threshold ( $V_{thres}$ ) for comparison; scale = 100 mV/ms, 20 mV. *Below*, enlarged inset to illustrate differences in AHP minimum amplitude between WT (arrows; 0.5 mM EGTA, black; 5 mM EGTA, gray) and KO (arrows; 0.5 mM EGTA, magenta; 5 mM EGTA, light purple); scale = 100 mV/ms, 5 mV.

**K)** Immunohistochemistry of WT and KO cerebellar slices stained for parvalbumin (PV; cyan) to indicate PC morphology, and the BK channel (magenta), which is involved in AHP generation; Scale 5  $\mu$ m. *Below*, merged image at 4x zoom to illustrate membrane localization of BK channels; Scale 2  $\mu$ m.

110

111 rates, spike threshold as well as spike height (**Fig 3E-J**), indicating that this effect  
112 was limited to the  $K_{Ca}$ -mediated AHP. Additionally, there was no change in BK  
113 membrane localization in PCs by immunohistochemistry (**Fig 3K**; Membrane BK  
114 density: WT =  $0.82 \pm 0.13$ ,  $n = 4$ ; KO =  $0.75 \pm 0.08$ ,  $n = 3$ ;  $p = 0.7$ ; Student's unpaired  
115 t-test), consistent with normal BK expression and function found in other neurons in  
116 *duffy* mice (20).

117 To determine whether  $K_{Ca}$  channels were functionally uncoupled from VGCC-  
118 mediated  $Ca^{2+}$  influx in KO mice, we dialyzed PCs with an increased EGTA  
119 concentration (from 0.5 mM to 5 mM) sufficient to uncouple VGCC-BK signaling  
120 (21). This additional  $Ca^{2+}$  buffering reduced the AHP amplitude in WT cells to the

121 same amplitudes as the KO, and had no effect on the AHP in KO cells (**Fig 3C-D**).

122 Thus, increased Ca<sup>2+</sup> buffering uncoupled VGCC-K<sub>Ca</sub> signaling in WT, but K<sub>Ca</sub>

123 channels were already functionally uncoupled in the  $\alpha 2\delta$ -2 KO.

124

## 125 **Discussion**

126 As a primary signal in neurons, precise spatiotemporal regulation of Ca<sup>2+</sup>  
127 influx is essential to maintain fidelity of Ca<sup>2+</sup>-dependent processes. Consequently,  
128 the molecules controlling VGCC coupling to downstream effectors is critical to  
129 neuronal function. Since their initial discovery as VGCC-associated molecules,  
130 multiple lines of evidence suggest  $\alpha 2\delta$  proteins are involved trafficking of VGCCs to  
131 the plasma membrane (8). However, these conclusions were necessarily based on  
132 heterologous expression systems, as most neurons express more than one  $\alpha 2\delta$   
133 isoform. Thus, information of postsynaptic auxiliary VGCC roles of  $\alpha 2\delta$  proteins in  
134 neurons is limited. Because PCs selectively express only one isoform,  $\alpha 2\delta$ -2 (11-13),  
135 the *CACNA2D2* KO mouse provides an ideal model to examine roles for  $\alpha 2\delta$ -2  
136 proteins in functional VGCC-signaling in postsynaptic compartments. Our results  
137 demonstrate that two distinct signaling mechanisms, DSE and K<sub>Ca</sub> signaling, are  
138 disrupted in  $\alpha 2\delta$ -2 KO PCs, indicating a functional loss of postsynaptic VGCC  
139 nanodomains (4, 5, 14, 21).

140 How does  $\alpha 2\delta$ -2, a largely extracellular protein, mediate functional coupling  
141 of VGCCs with intracellular effector proteins? It is possible that  $\alpha 2\delta$ -2 directly

142 associates with other extracellular proteins involved in VGCC domains (8). As  
143 endocannabinoid machinery resides at synapses (22), and  $\alpha 2\delta$  proteins are  
144 important for synapse formation (10-13),  $\alpha 2\delta$  could potentially regulate VGCC  
145 nanodomains by binding to presynaptic adhesion proteins. Another possibility is  
146 that  $\alpha 2\delta$ -2 localizes VGCCs to lipid rafts. Though VGCCs are abundant in non-lipid  
147 raft membrane fractions where they are independent of  $\alpha 2\delta$ -2, VGCCs and  $\alpha 2\delta$ -2  
148 colocalize in lipid rafts isolated from cerebellar homogenates (23). Intriguingly, DAG  
149 lipase- $\alpha$ , the enzyme responsible for synthesis of endocannabinoids involved in DSE,  
150 has also been isolated in lipid rafts (24), and mislocalization of VGCCs away from  
151 lipid rafts might explain the reduced basal endocannabinoid tone at cerebellar  
152 synapses in the *ducky* mutant (25). Our results provide clues for future work to  
153 directly assay  $\alpha 2\delta$ -2 interacting proteins and subcellular localization of VGCCs in  
154 PCs. The deficits in  $\text{Ca}^{2+}$ -dependent signaling we observed may contribute to the  
155 dramatic neurologic phenotypes in  $\alpha 2\delta$ -2 KO mice. Future investigations of the  
156 coupling roles of other  $\alpha 2\delta$  isoforms in neurons will provide valuable insights into  
157 how these proteins impact neurological functions across the brain.

## 158 **Materials & Methods**

159 Animals: *Cacna2d2* knockout mice (*Cacna2d2*<sup>tm1Svi</sup>, MGI = 3055290;  
160 generously supplied by Drs. Sergey Ivanov and Lino Tessarollo) were obtained as  
161 cryopreserved sperm and re-derived via *in vitro* fertilization on a C57BL/6J  
162 background. Breeding mice were kept heterozygous, and genotyping was performed  
163 as previously described (13). Mice were maintained in facilities fully accredited by  
164 the Association for Assessment and Accreditation of Laboratory Animal Care and  
165 veterinary care was provided by Oregon Health & Science University's Department  
166 of Comparative Medicine. All animal care and experiments were performed in  
167 accordance with state and federal guidelines, and all protocols were approved by  
168 the OHSU Institutional Animal Care and Use Committee.

169

170 Slice Preparation and Electrophysiology: Male and female mice were used between  
171 the ages of p21-30. KO and WT littermates were deeply anesthetized and  
172 transcardially perfused with ice-cold choline-based solution containing (mM): 125  
173 choline-Cl, 2.5 KCl, 1.25 NaH<sub>2</sub>PO<sub>4</sub>, 0.44 ascorbate, 2 Na pyruvate, 3 3-myo-inositol,  
174 10 D-glucose, 25 NaHCO<sub>3</sub>, 7 MgCl<sub>2</sub>, 0.5 CaCl<sub>2</sub> (osmolarity adjusted to 305 mOsm) and  
175 equilibrated with 95% O<sub>2</sub> and 5% CO<sub>2</sub> gas mixture. Acute 300 μm sagittal slices  
176 were cut from cerebellum using a vibratome (VT1200, Leica Microsystems), and  
177 incubated for 30 minutes in standard artificial cerebral spinal fluid (aCSF) at 34°C.

178 Voltage clamp recordings: Whole-cell recordings were obtained using 1-3  
179 MΩ borosilicate glass pipettes filled with internal solution containing (in mM): 100

180 CsMeSO<sub>4</sub>, 35 CsCl, 15 TEA-Cl, 1 MgCl<sub>2</sub>, 15 HEPES, 2 ATP-Mg, 0.3 TrisGTP, 10  
181 phosphocreatine, and 2 QX-314. A large batch of this internal base solution was  
182 equally divided and 10, 2 or 0.2 mM EGTA was added to each third. All internals  
183 were adjusted to pH 7.3 with CsOH and osmolarity to 293 mOsm. External solution  
184 contained (in mM): 125 NaCl, 25 NaHCO<sub>3</sub>, 1.25 NaH<sub>2</sub>PO<sub>4</sub>, 3 KCl, 25 Dextrose, 2 CaCl<sub>2</sub>,  
185 1 MgCl<sub>2</sub> (osmolarity adjusted to 300 mOsm) and was continuously perfused via  
186 roller pump.

187 PCs were identified and recorded as previously described (13). Briefly, PCs  
188 were chosen from the vermis lobe VI, were identified by soma size and location in  
189 the PC layer, and whole-cell patch-clamp recordings were obtained in voltage clamp  
190 mode. Cell capacitance, series resistance and input resistance monitored in real time  
191 using intermittent -10 mV voltage steps. Inhibition was blocked in all experiments  
192 by 10 μM SR95531 (Tocris), and 0.2-0.5 μM NBQX (Tocris) was included to maintain  
193 voltage clamp of climbing fiber-mediated excitatory postsynaptic currents (EPSCs).  
194 All voltage clamp recordings were performed at room temperature. Signals were  
195 amplified with a MultiClamp 700B (Molecular Devices) amplifier and pipette  
196 capacitance was compensated using MultiClamp software. Signals were low-pass  
197 filtered at 6 kHz and sampled at 10 kHz, and digitized with a National Instruments  
198 analog-to-digital board. All recordings were acquired and analyzed using IgorPro-  
199 based (Wavemetrics) software.

200 For DSE experiments, PCs were held at -70 mV while climbing fiber-mediated  
201 EPSCs were evoked using a monopolar glass electrode in the granule cell layer. After

202 obtaining 2 minutes of baseline responses at 0.2 Hz, a depolarizing voltage step to 0  
203 mV of 1 s, 500 ms or 250 ms duration was delivered to induce DSE, after which PCs  
204 were returned to -70 mV and 0.2 Hz stimulation was continued. DSE plasticity is  
205 acute, and most synapses recover back to baseline EPSC amplitudes within < 60  
206 seconds (2). As a small amount of “run down” was routinely observed in the evoked  
207 CF-mediated EPSC amplitude, DSE inclusion criteria required EPSC amplitudes to  
208 return to 80% baseline within 2 minutes post-stimulation (opposed to “stepping” to  
209 decreased amplitude without recovery). A minimum of 5 minutes were waited  
210 between DSE inductions, and step length was randomized throughout experiment.  
211 Series resistance was not compensated; cells with series resistance >10 M $\Omega$ , or a >2  
212 M $\Omega$  change in series resistance over the course of the experiment were excluded.

213 For analysis, EPSC amplitudes were binned every 10 seconds (2 traces) and  
214 normalized to the 1 minute of baseline immediately preceding the depolarizing step.  
215 The ‘DSE magnitude’ (e.g. Figure 2E) is based on the average of EPSC amplitude 5  
216 and 10 s after the depolarizing step. Example traces shown are from 5 s after the  
217 depolarizing step. A minimum of 3 mice per genotype were used for each  
218 manipulation, with no more than 2 cells/treatment coming from one mouse. For  
219 data presentation, EPSC traces were off-line box-filtered at 1 kHz in Igor64 software.

220 Current clamp recordings: For spontaneous spike experiments, internal  
221 solution contained (in mM): 120 KCH<sub>3</sub>SO<sub>3</sub>, 10 HEPES, 10 NaCl, 2 MgCl<sub>2</sub>, 0.5 EGTA, 4  
222 ATP-Mg, 0.3 Tris-GTP, and 14 phosphocreatine, pH 7.35 adjusted with KOH  
223 (osmolarity adjusted to 293 mOsm). A stock of EGTA solution was added to aliquots

224 of internal, to increase [EGTA] to 5mM as needed. Synaptic inhibition was achieved  
225 with 10  $\mu$ M SR95531 (Tocris) and 10  $\mu$ M NBQX (Tocris), and recordings were made  
226 at 36°C using an in-line heater. PCs in whole-cell mode from vermis lobe VI were  
227 first held in voltage clamp mode to monitor access series and input resistance  
228 before switching to current clamp. Changes in access were corrected with bridge  
229 balance using Multiclamp software. For increased action potential waveform  
230 resolution, some current clamp experiments were sampled at 50 kHz.

231 Spontaneous spikes from tonically firing PCs with < 400 pA holding current  
232 and < 10 MOhm series were analyzed using the Igor64 Neuromatic tools. Firing  
233 frequency data was collected from 10 seconds of recording, which yielded ~100-  
234 500 spikes. Action potential properties were assessed by averaging 50 consecutive  
235 spikes. Afterhyperpolarization (AHP) amplitude was measured as the difference  
236 between the threshold voltage ( $V_{\text{thres}}$  = depolarization rate >10 V/s) and the  
237 minimum voltage reached within 5 ms of spiking. All current clamp data was taken  
238 at least 3 minutes after break-in to allow time for internal solution to dialyze. Spike  
239 traces were box filtered for data visualization, and phase plane plots were made  
240 using Igor64.

241

242 Immunohistochemistry: Immunohistochemistry was performed as described (13).  
243 Briefly, p21 WT and KO mice were deeply anesthetized and transcardially perfused  
244 with ice-cold PBS followed by 4% paraformaldehyde (PFA)-PBS. Following  
245 decapitation, brains were removed and fixed overnight in 4% PFA-PBS, and stored

246 in PBS at 4°C. Sagittal cerebellar slices were made at 50 µm thickness using a  
247 vibratome, and slices containing vermis lobe VI were permeabilized for 1 hr with  
248 0.4% Triton-PBS with 10% normal horse serum at RT. Slices were stained with goat  
249 anti-Parvalbumin (Swant #PVG-213; 1:1000) and mouse anti-BK (Neuromab #73-  
250 022; 1:500) overnight at 4°C. Corresponding fluorescently labeled secondaries  
251 (Invitrogen; 1:500) were applied after rinsing 3x in PBS, and slices were mounted  
252 on glass cover slips using Fluoromount G (Sigma-Aldrich).

253 BK membrane expression was imaged using 63x oil immersion lens on a  
254 LSM980 microscope with ZEN software. ~7 µm z-stack images of primary PC  
255 dendrites were acquired at 0.15 µm intervals using the PV channel at 4.5 x zoom  
256 with 680 x 680 pixel resolution. Airyscan images were processed using default  
257 settings in ZEN. Quantification of membrane localized BK puncta was done by a  
258 separate researcher, blinded to genotype, using the most transverse section of  
259 dendrite from each z-stack. For presentation, images were processed in Fiji/ImageJ,  
260 illustrating 0.45 µm maximum projections, and the panel was assembled using  
261 Adobe Photoshop.

262

263 Statistics: The data were tested for normality using Shapiro-Wilk test. Data from  
264 male and female mice were grouped. The difference in magnitude of DSE between  
265 the WT 250 ms depolarization step condition and other groups were compared  
266 using a one-way ANOVA with Dunnett's correction for multiple comparisons. For  
267 current clamp data, student's unpaired t-tests were used for spike frequency



268 comparison between WT and KO. In current clamp experiments using 5 mM EGTA,  
269 only AHP amplitude was significantly different (all other measures not shown). For  
270 this data, a one-way ANOVA with Fisher's LSD was used to compare all groups to  
271 WT 0.5 mM condition. All electrophysiology experiments utilized at least 3 animals  
272 per genotype, where  $n = \#$  cells. For immunohistochemistry of BK membrane  
273 density measurements, 2-4 images per animal were averaged ( $n =$  mice), and an  
274 unpaired t-test was used for comparison. Data were graphed in Prism GraphPad  
275 version 8 and are reported as the mean  $\pm$  SEM. \* $p < 0.05$ , \*\* $p < 0.01$ , \*\*\* $p < 0.001$ .

276

## References

277

- 278 1. Nakamura Y, Reva M, DiGregorio DA. Variations in Ca(2+) Influx Can Alter  
279 Chelator-Based Estimates of Ca(2+) Channel-Synaptic Vesicle Coupling Distance. *J*  
280 *Neurosci.* 2018;38(16):3971-87.
- 281 2. Brenowitz SD, Regehr WG. Calcium dependence of retrograde inhibition by  
282 endocannabinoids at synapses onto Purkinje cells. *The Journal of Neuroscience.*  
283 2003;23(15):6373-84.
- 284 3. Brown SP, Safo PK, Regehr WG. Endocannabinoids inhibit transmission at  
285 granule cell to Purkinje cell synapses by modulating three types of presynaptic  
286 calcium channels. *J Neurosci.* 2004;24(24):5623-31.
- 287 4. Kreitzer AC, Regehr WG. Retrograde Inhibition of Presynaptic Calcium Influx  
288 by Endogenous Cannabinoids at Excitatory Synapses onto Purkinje Cells. *Neuron.*  
289 2001;29:10.
- 290 5. Indriati DW, Kamasawa N, Matsui K, Meredith AL, Watanabe M, Shigemoto R.  
291 Quantitative localization of Cav2.1 (P/Q-type) voltage-dependent calcium channels  
292 in Purkinje cells: somatodendritic gradient and distinct somatic coclustering with  
293 calcium-activated potassium channels. *J Neurosci.* 2013;33(8):3668-78.
- 294 6. Raman IM, Bean BP. Ionic Currents Underlying Spontaneous Action  
295 Potentials in Isolated Cerebellar Purkinje Neurons. *Journal of Neuroscience.*  
296 1999;19(5):12.
- 297 7. Womack MD, Chevez C, Khodakhah K. Calcium-activated potassium channels  
298 are selectively coupled to P/Q-type calcium channels in cerebellar Purkinje neurons.  
299 *J Neurosci.* 2004;24(40):8818-22.
- 300 8. Dolphin AC, Lee A. Presynaptic calcium channels: specialized control of  
301 synaptic neurotransmitter release. *Nat Rev Neurosci.* 2020;21(4):213-29.
- 302 9. Hoppa MB, Lana B, Margas W, Dolphin AC, Ryan TA. alpha2delta expression  
303 sets presynaptic calcium channel abundance and release probability. *Nature.*  
304 2012;486(7401):122-5.
- 305 10. Eroglu C, Allen NJ, Susman MW, O'Rourke NA, Park CY, Ozkan E, et al.  
306 Gabapentin receptor alpha2delta-1 is a neuronal thrombospondin receptor  
307 responsible for excitatory CNS synaptogenesis. *Cell.* 2009;139(2):380-92.
- 308 11. Cole RL, Lechner SM, Williams ME, Prodanovich P, Bleicher L, Varney MA, et  
309 al. Differential distribution of voltage-gated calcium channel alpha-2 delta

- 310 (alpha2delta) subunit mRNA-containing cells in the rat central nervous system and  
311 the dorsal root ganglia. *J Comp Neurol.* 2005;491(3):246-69.
- 312 12. Lein ES, Hawrylycz MJ, Ao N, Ayres M, Bensinger A, Bernard A, et al. Genome-  
313 wide atlas of gene expression in the adult mouse brain. *Nature.*  
314 2007;445(7124):168-76.
- 315 13. Beeson KA, Beeson R, Westbrook GL, Schnell E. alpha2delta-2 Protein  
316 Controls Structure and Function at the Cerebellar Climbing Fiber Synapse. *J*  
317 *Neurosci.* 2020;40(12):2403-15.
- 318 14. Brenowitz SD, Best AR, Regehr WG. Sustained elevation of dendritic calcium  
319 evokes widespread endocannabinoid release and suppression of synapses onto  
320 cerebellar Purkinje cells. *J Neurosci.* 2006;26(25):6841-50.
- 321 15. Donato R, Page KM, Koch D, Nieto-Rostro M, Foucault I, Davies A, et al. The  
322 ducky(2J) mutation in *Cacna2d2* results in reduced spontaneous Purkinje cell  
323 activity and altered gene expression. *J Neurosci.* 2006;26(48):12576-86.
- 324 16. Edgerton JR, Reinhart PH. Distinct contributions of small and large  
325 conductance Ca<sup>2+</sup>-activated K<sup>+</sup> channels to rat Purkinje neuron function. *J Physiol.*  
326 2003;548(Pt 1):53-69.
- 327 17. Niday Z, Bean BP. BK channel regulation of after-potentials and burst firing in  
328 cerebellar Purkinje neurons. *J Neurosci.* 2021.
- 329 18. Womack M, Khodakhah K. Active Contribution of Dendrites to the Tonic and  
330 Trimodal Patterns of Activity in Cerebellar Purkinje Neurons. *The Journal of*  
331 *Neuroscience.* 2002;22(24):10603-12.
- 332 19. Walter JT, Alvina K, Womack MD, Chevez C, Khodakhah K. Decreases in the  
333 precision of Purkinje cell pacemaking cause cerebellar dysfunction and ataxia. *Nat*  
334 *Neurosci.* 2006;9(3):389-97.
- 335 20. Fell B, Eckrich S, Blum K, Eckrich T, Hecker D, Obermair GJ, et al.  
336 alpha2delta2 Controls the Function and Trans-Synaptic Coupling of Cav1.3 Channels  
337 in Mouse Inner Hair Cells and Is Essential for Normal Hearing. *J Neurosci.*  
338 2016;36(43):11024-36.
- 339 21. Fakler B, Adelman JP. Control of K(Ca) channels by calcium  
340 nano/microdomains. *Neuron.* 2008;59(6):873-81.
- 341 22. Uchigashima M, Narushima M, Fukaya M, Katona I, Kano M, Watanabe M.  
342 Subcellular arrangement of molecules for 2-arachidonoyl-glycerol-mediated  
343 retrograde signaling and its physiological contribution to synaptic modulation in the  
344 striatum. *J Neurosci.* 2007;27(14):3663-76.

- 345 23. Davies A, Douglas L, Hendrich J, Wratten J, Tran Van Minh A, Foucault I, et al.  
346 The calcium channel alpha2delta-2 subunit partitions with CaV2.1 into lipid rafts in  
347 cerebellum: implications for localization and function. *J Neurosci*.  
348 2006;26(34):8748-57.
- 349 24. Rimmerman N, Hughes HV, Bradshaw HB, Pazos MX, Mackie K, Prieto AL, et  
350 al. Compartmentalization of endocannabinoids into lipid rafts in a dorsal root  
351 ganglion cell line. *Br J Pharmacol*. 2008;153(2):380-9.
- 352 25. Wang X, Whalley BJ, Stephens GJ. The du(2J) mouse model of ataxia and  
353 absence epilepsy has deficient cannabinoid CB(1) receptor-mediated signalling. *J*  
354 *Physiol*. 2013;591(16):3919-33.
- 355
